# Supplementary material
Source: publisher figshare collection journal article supplement (https://rs.figshare.com/ndownloader/files/17853680)

## ELECTRONIC SUPPLEMENTARY MATERIAL

### Supplementary figure captions

**Figure S1.** Time-varying hinge angles ( $\beta$ ) for  $Re=50$  tracked using ImageJ program. (A) 0% phase lag; (B) 16.7% phase lag; (C) 25% phase lag; (D) 33.3% phase lag. Time is represented as fraction of stroke period ( $T=0.667$  s). For the tail-most paddle (P4 in inset of Figure 2A), PS is from 0 to 0.5 and RS is from 0.5 to 1.

**Figure S2.** Time-varying hinge angles ( $\beta$ ) for  $Re=250$  tracked using ImageJ program. (A) 0% phase lag; (B) 16.7% phase lag; (C) 25% phase lag; (D) 33.3% phase lag. Cycle duration, PS and RS portions are as described in caption of Figure S1.

**Figure S3.** Time-varying hinge angles ( $\beta$ ) for  $Re=800$  tracked using ImageJ program. (A) 0% phase lag; (B) 16.7% phase lag; (C) 25% phase lag; (D) 33.3% phase lag. Cycle duration, PS and RS portions are as described in caption of Figure S1.

**Figure S4.** Velocity vector fields overlaid on out-of-plane z-vorticity ( $\omega_z$ ) contours for metachronal paddling of four paddles, with 16.7% phase lag (A-H) and 33.3% phase lag (I-P), at  $Re=250$ . (A, I) 20% PS. (B, J) 40% PS. (C, K) 60% PS. (D, L) 80% PS. (E, M) 20% RS. (F, N) 40% RS. (G, O) 60% RS. (H, P) 80% RS. Red coloring represents counterclockwise vorticity, while blue represents clockwise vorticity. % PS and % RS are referenced with respect to right-most paddle (P4 in inset of Figure 2A) that is near the tail-end of the model.

**Figure S5.** Velocity vector fields overlaid on 2D divergence of velocity ( $\nabla \cdot \vec{U} = \partial u / \partial x + \partial v / \partial y$ ) contours for synchronous paddling (0% phase lag) of four paddles at  $Re=250$ . (A) 20% PS. (B) 40% PS. (C) 60% PS. (D) 80% PS. (E) 20% RS. (F) 40% RS. (G) 60% RS. (H) 80% RS, referenced with respect to P4 (tail-most paddle, see inset of Figure 2A). 2D divergence is used to examine three-dimensionality of the flow field. Here, red coloring represents positive divergence (out-of-plane source), and blue coloring represents negative divergence (out-of-plane sink). Regions of positive divergence are generated behind the tail-most paddle at the end of recovery stroke during synchronous paddling (time period between H and A).

**Figure S6.** Velocity vector fields overlaid on 2D divergence of velocity ( $\nabla \cdot \vec{U}$ ) contours for metachronal paddling of four paddles with 25% phase lag, at  $Re=250$ . Definitions of contour coloring, vector scaling, % PS, % RS are the same as in Figure S5. For metachronal paddling, regions of positive divergence are generated behind the tail-most paddle at the end of recovery

stroke (H), as well as between paddles when they are moving away from each other (e.g. between P2 and P3 in part E).

**Figure S7.** Velocity vector fields overlaid on 2D divergence of velocity ( $\nabla \cdot \vec{U}$ ) contours for metachronal paddling of four paddles with 25% phase lag, at  $Re=50$ . Definitions of contour coloring, vector scaling, % PS, % RS are the same as in Figure S5. For  $Re=50$ , regions of positive divergence are generated in the same locations as at  $Re=250$  (Figure S6), but are of smaller magnitude (less three-dimensionality of the flow).

**Figure S8.** Velocity vector fields overlaid on 2D divergence of velocity ( $\nabla \cdot \vec{U}$ ) contours for metachronal paddling of four paddles with 25% phase lag, at  $Re=800$ . Definitions of contour coloring, vector scaling, % PS, % RS are the same as in Figure S5. For  $Re=800$ , regions of positive divergence are generated in the same locations as at  $Re=250$  (Figure S6), but are of larger magnitude (more three-dimensionality of the flow).

**Figure S9.** Velocity vector fields overlaid on out-of-plane z-vorticity ( $\omega_z$ ) contours for synchronous paddling (0% phase lag) of four paddles at  $Re=50$ . (A) 20% PS. (B) 40% PS. (C) 60% PS. (D) 80% PS. (E) 20% RS. (F) 40% RS. (G) 60% RS. (H) 80% RS. Red coloring represents counterclockwise vorticity, while blue represents clockwise vorticity. % PS and % RS are referenced with respect to P4 in inset of Figure 2A.

**Figure S10.** Velocity vector fields overlaid on out-of-plane z-vorticity ( $\omega_z$ ) contours for metachronal paddling of four paddles at 16.7% phase lag, at  $Re=50$ . Definitions of contour coloring, % PS, % RS are the same as in Figure S9.

**Figure S11.** Velocity vector fields overlaid on out-of-plane z-vorticity ( $\omega_z$ ) contours for metachronal paddling of four paddles at 33.3% phase lag, at  $Re=50$ . Definitions of contour coloring, % PS, % RS are the same as in Figure S9.

**Figure S12.** Velocity vector fields overlaid on out-of-plane z-vorticity ( $\omega_z$ ) contours for synchronous paddling (0% phase lag) of four paddles, at  $Re=800$ . Definitions of contour coloring, % PS, % RS are the same as in Figure S9.

**Figure S13.** Velocity vector fields overlaid on out-of-plane z-vorticity ( $\omega_z$ ) contours for metachronal paddling of four paddles at 16.7% phase lag, at  $Re=800$ . Definitions of contour coloring, % PS, % RS are the same as in Figure S9.

**Figure S14.** Velocity vector fields overlaid on out-of-plane z-vorticity ( $\omega_z$ ) contours for metachronal paddling of four paddles at 33.3% phase lag, at  $Re=800$ . Definitions of contour coloring, % PS, % RS are the same as in Figure S9.

Figure S1

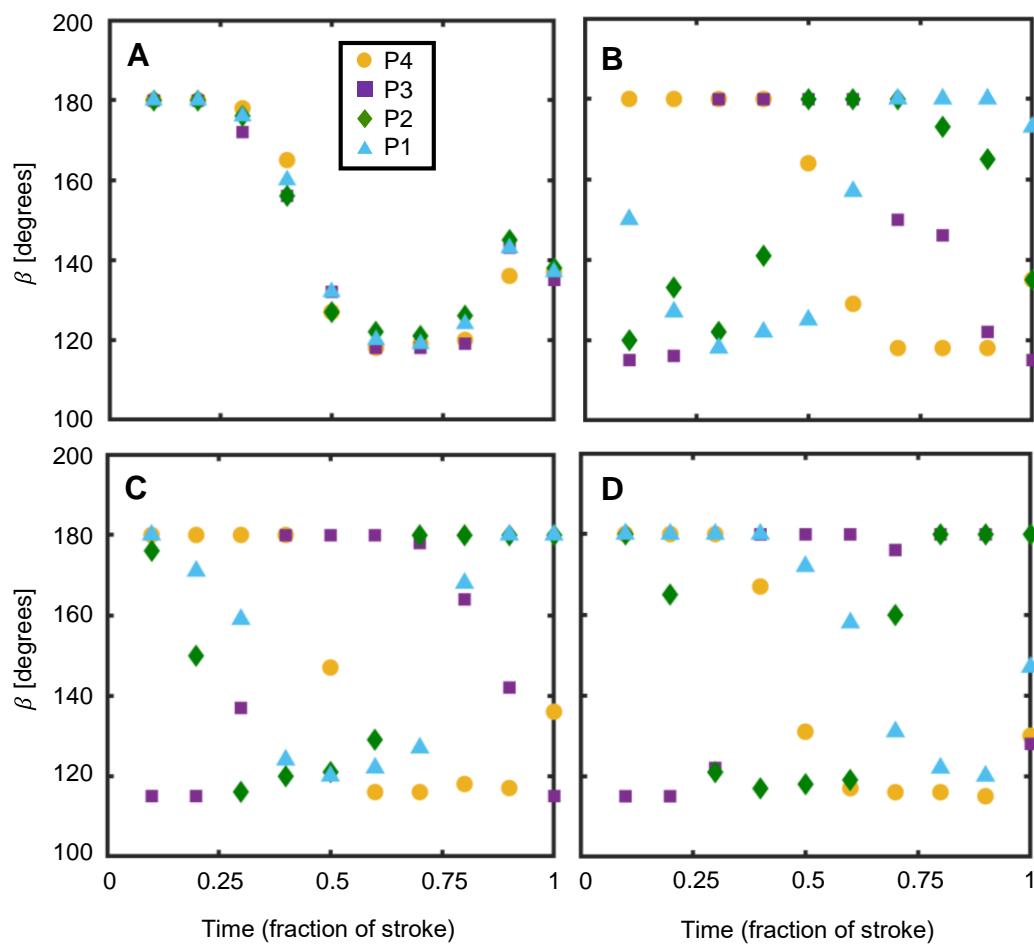

Figure S2

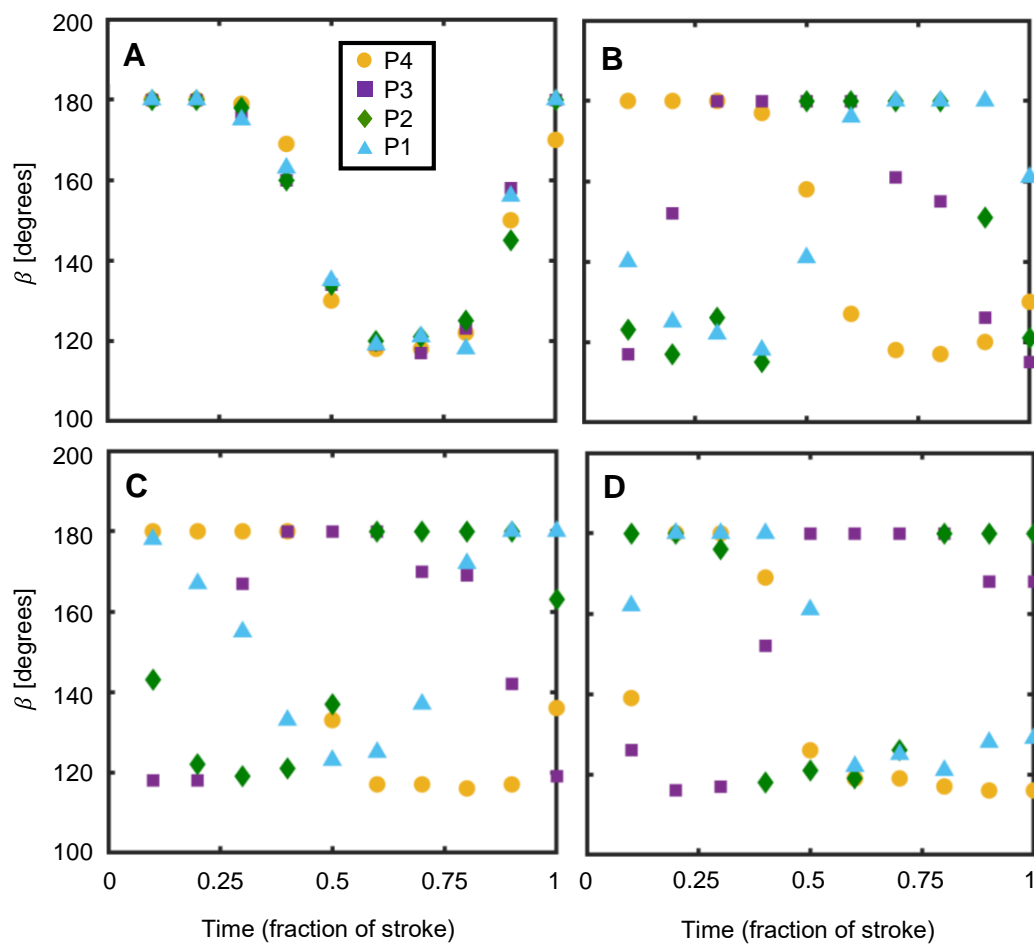

Figure S3

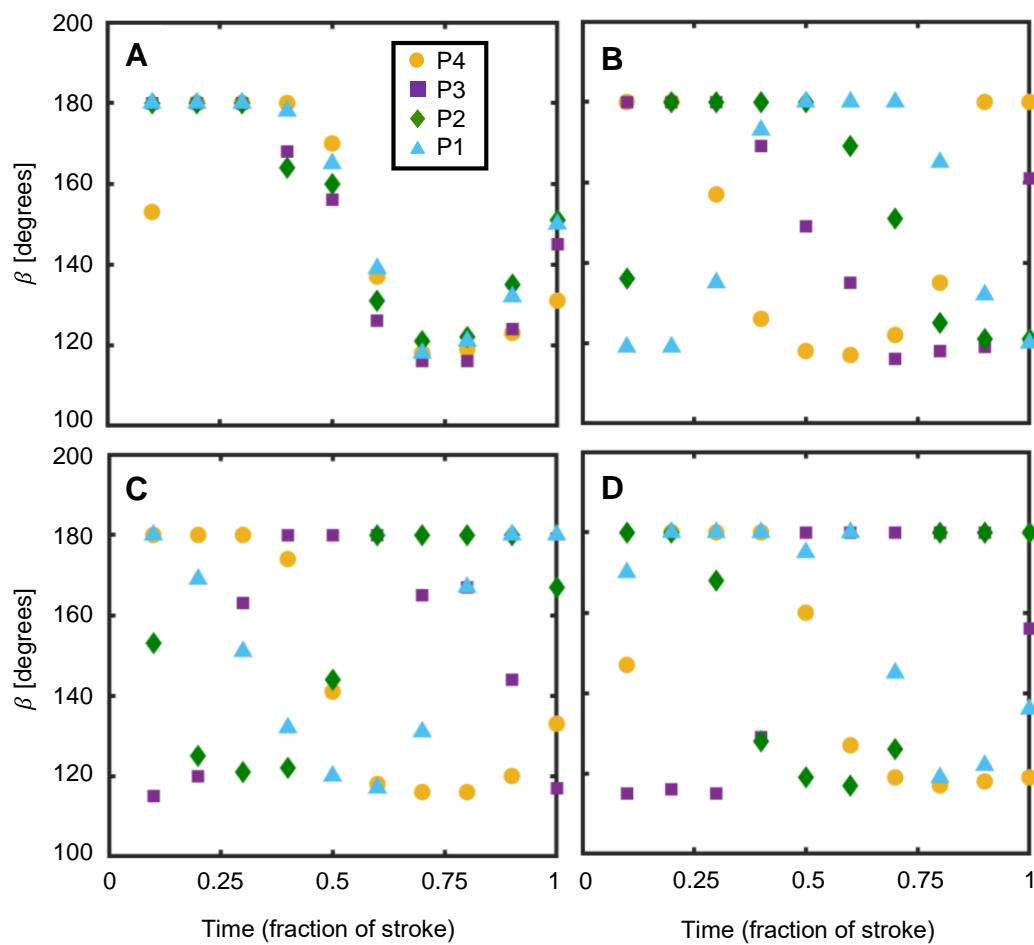



Figure S4

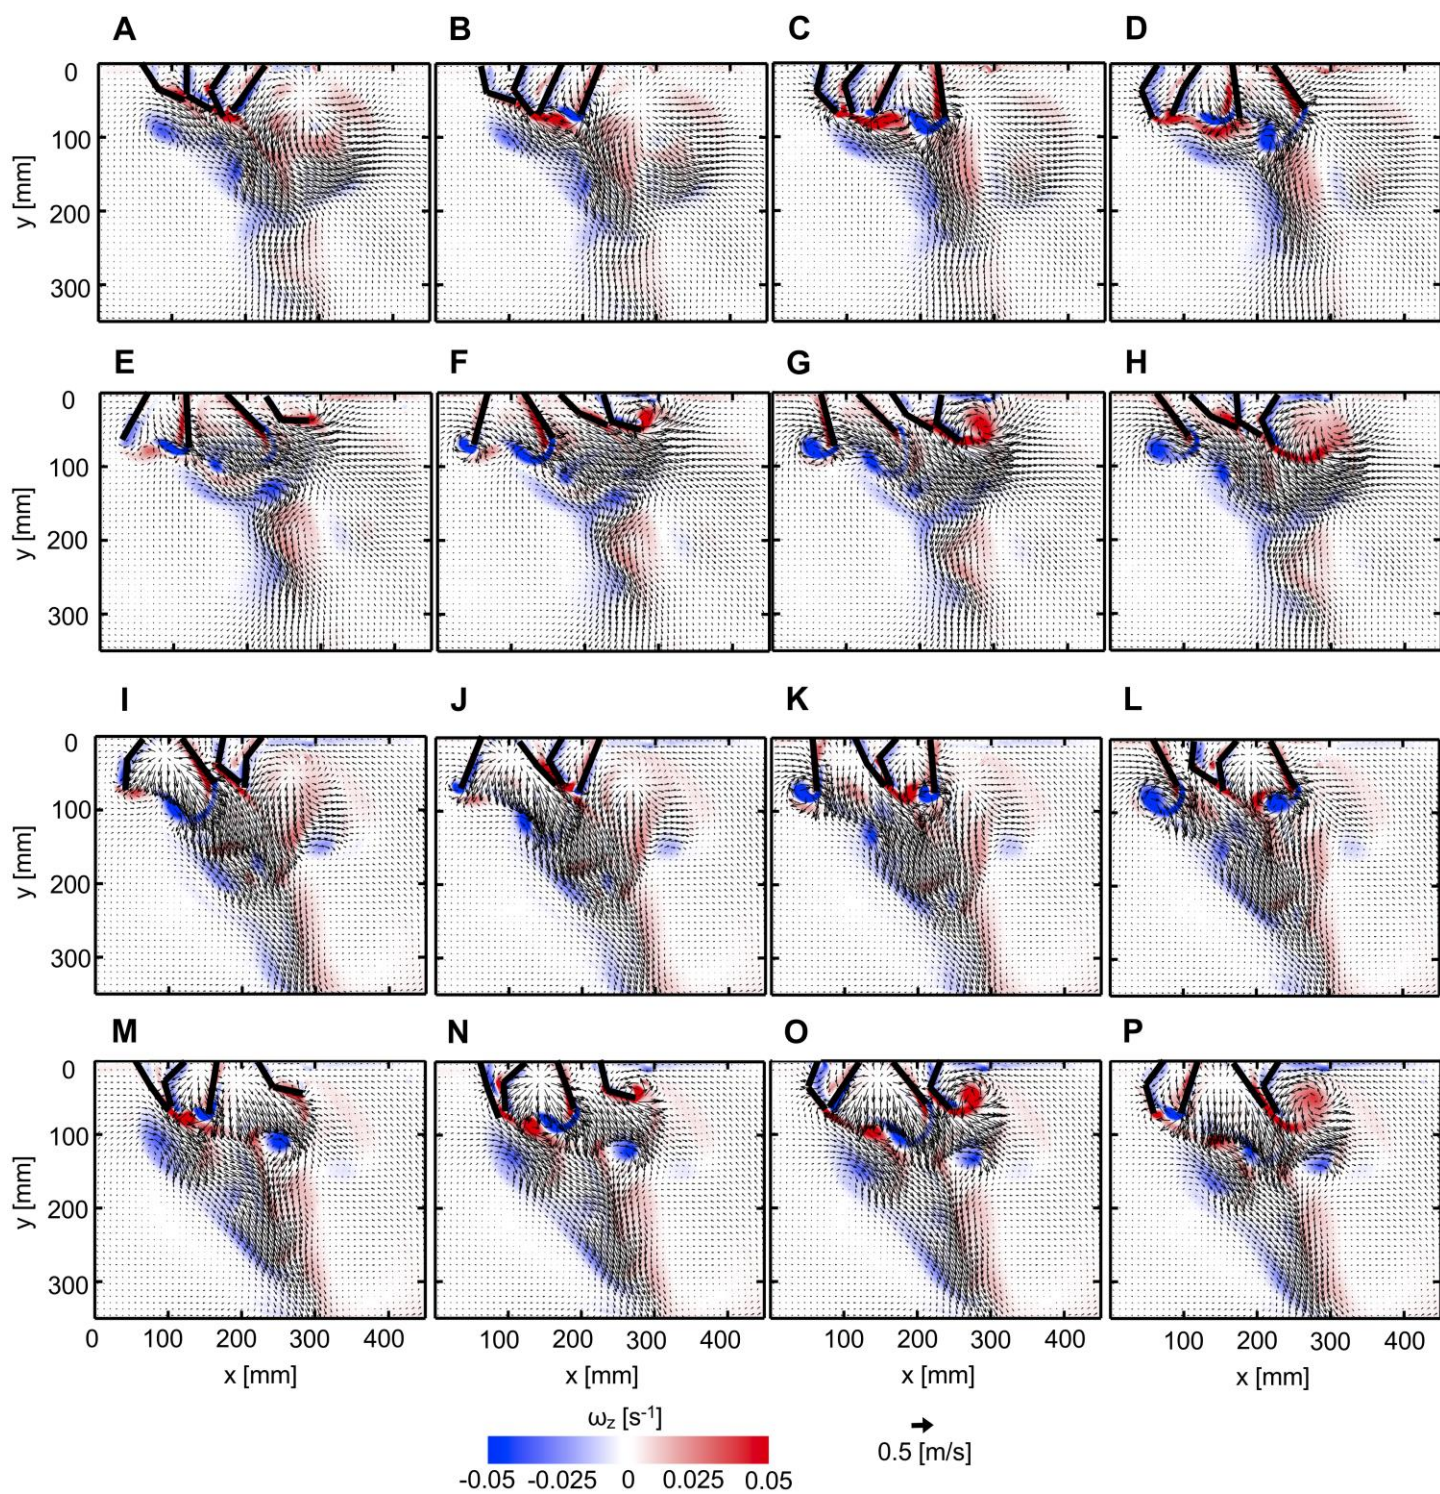



Figure S5

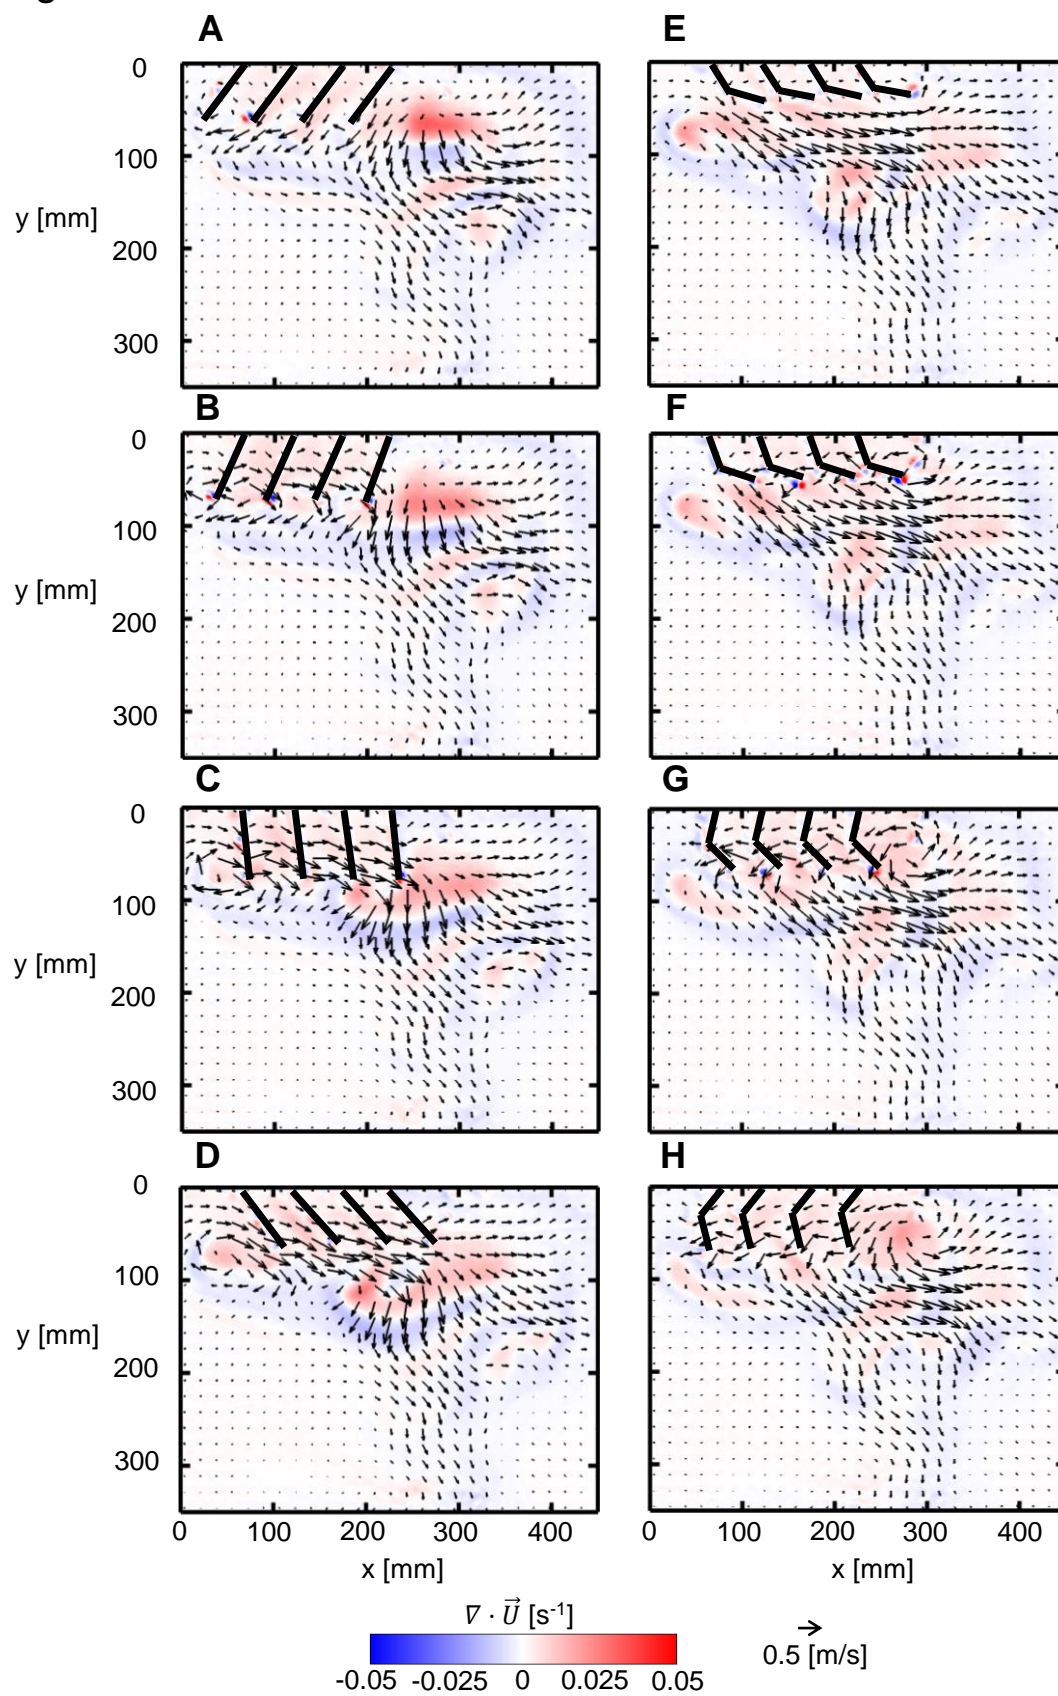



Figure S6

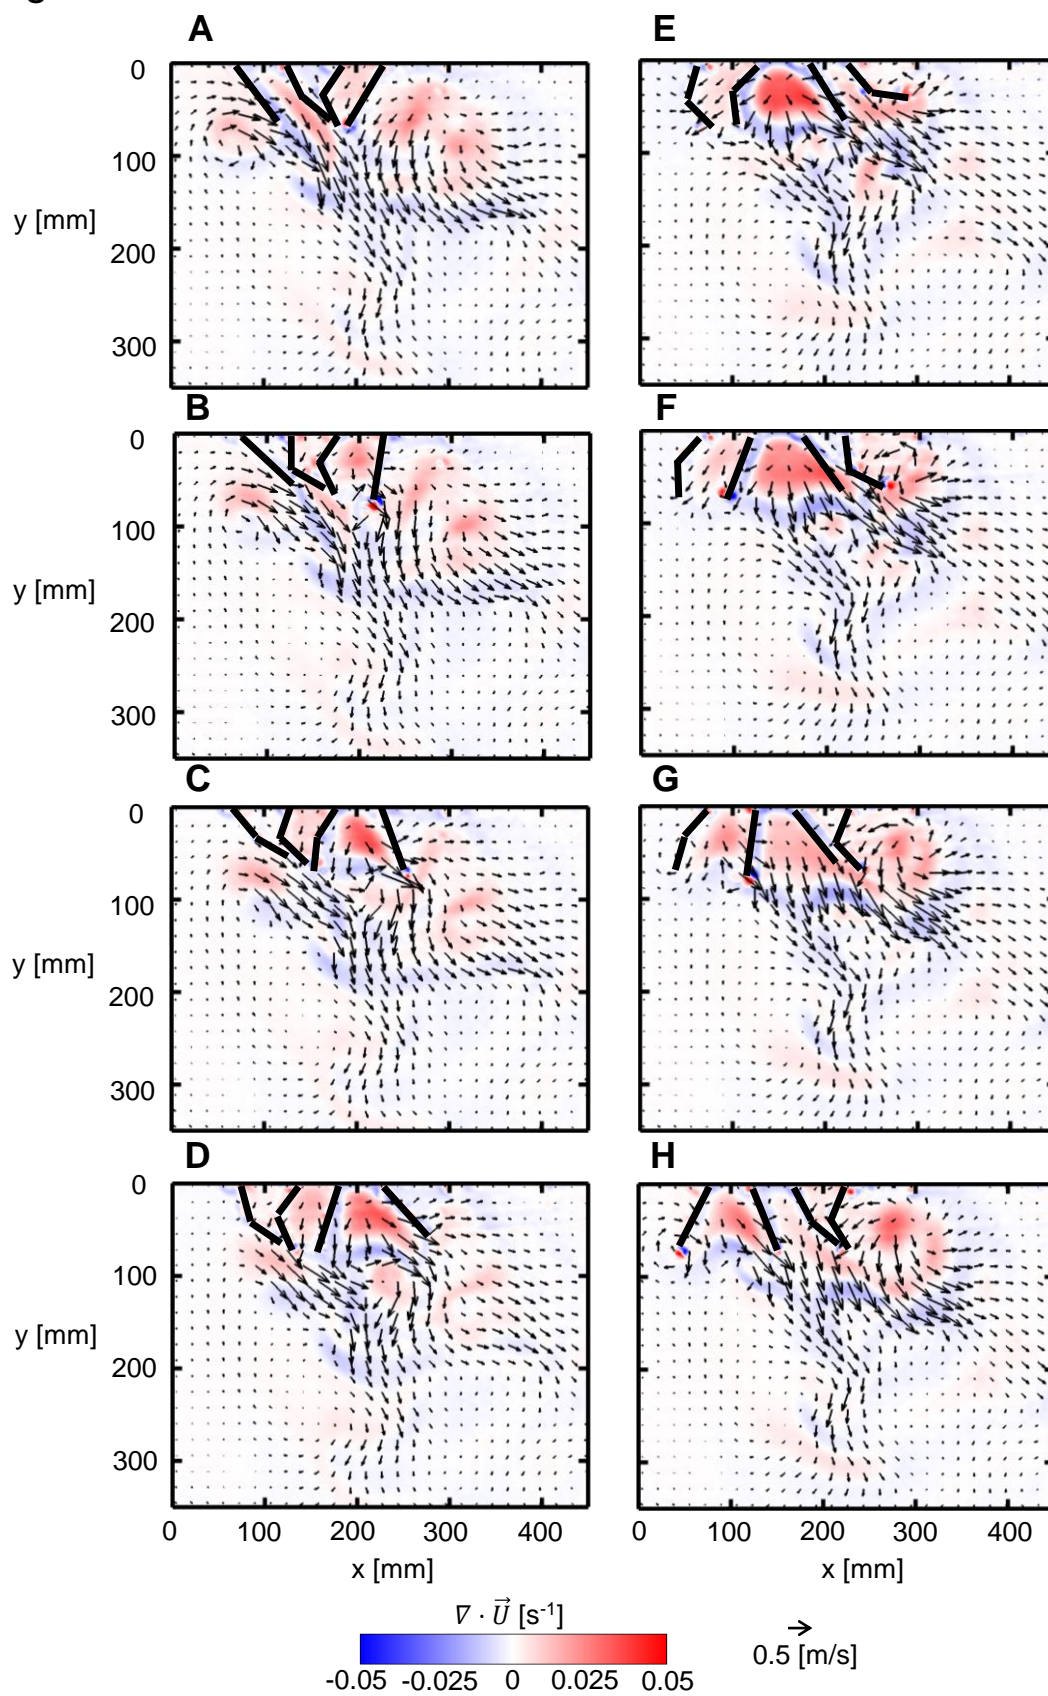

Figure S7

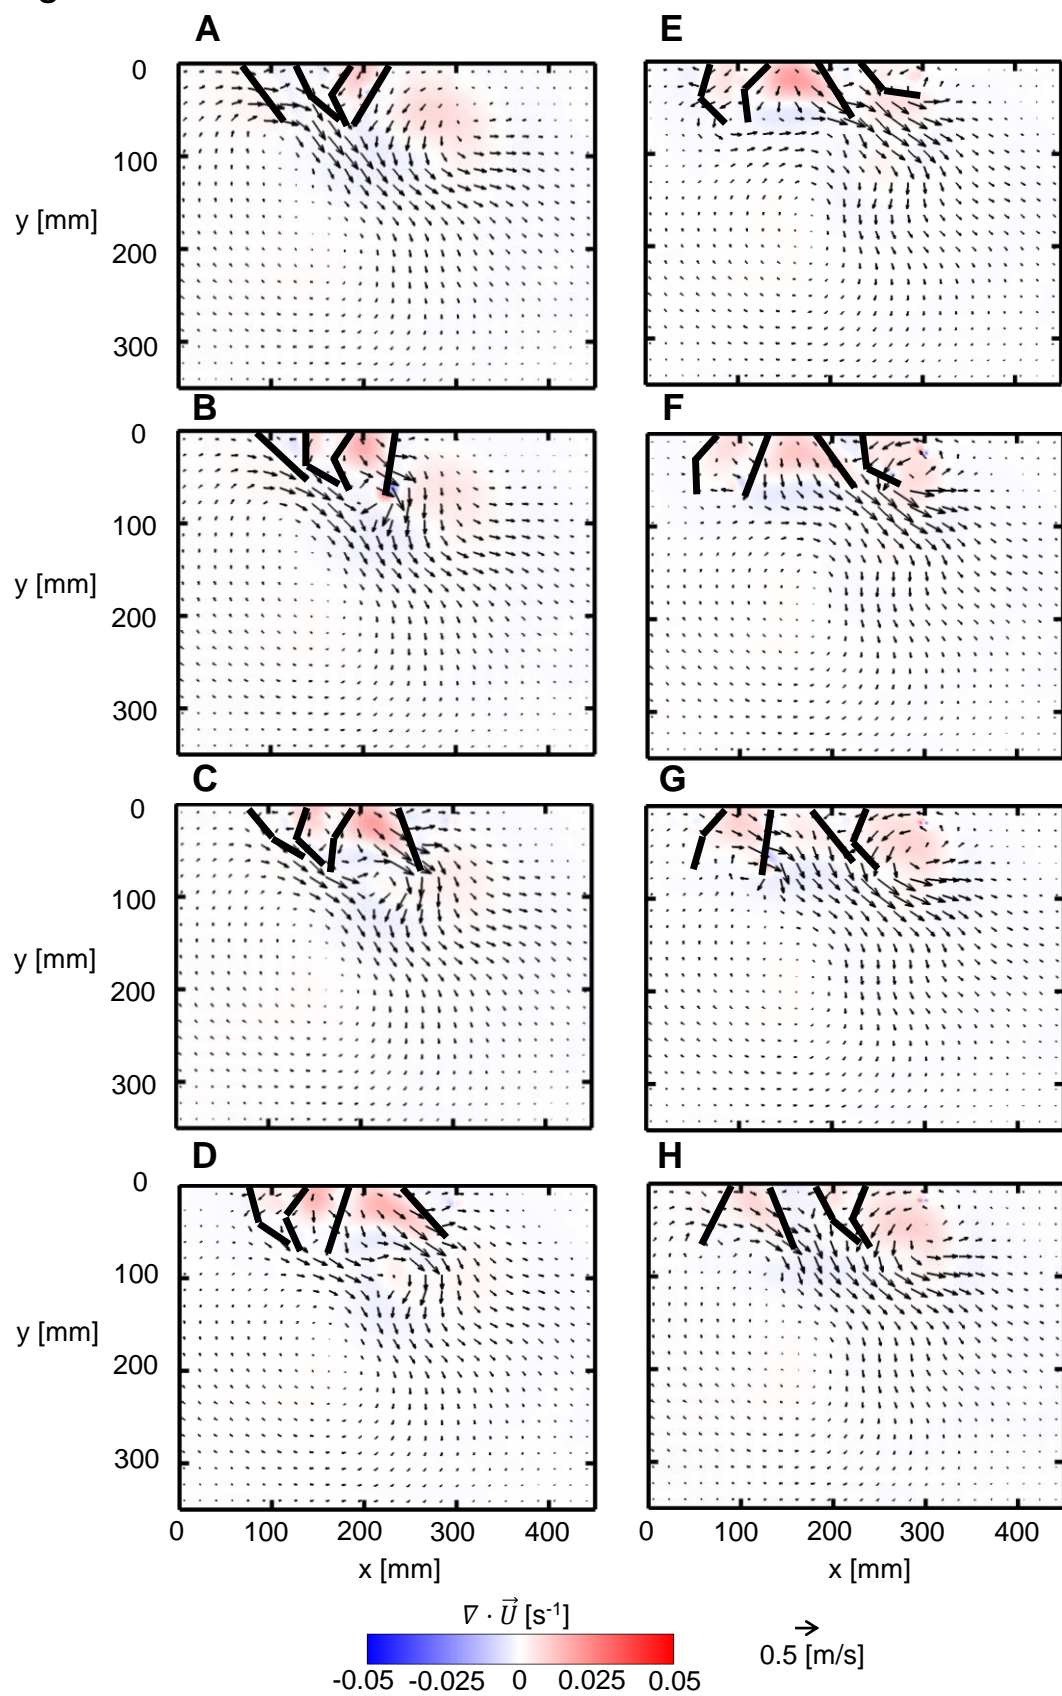



Figure S8

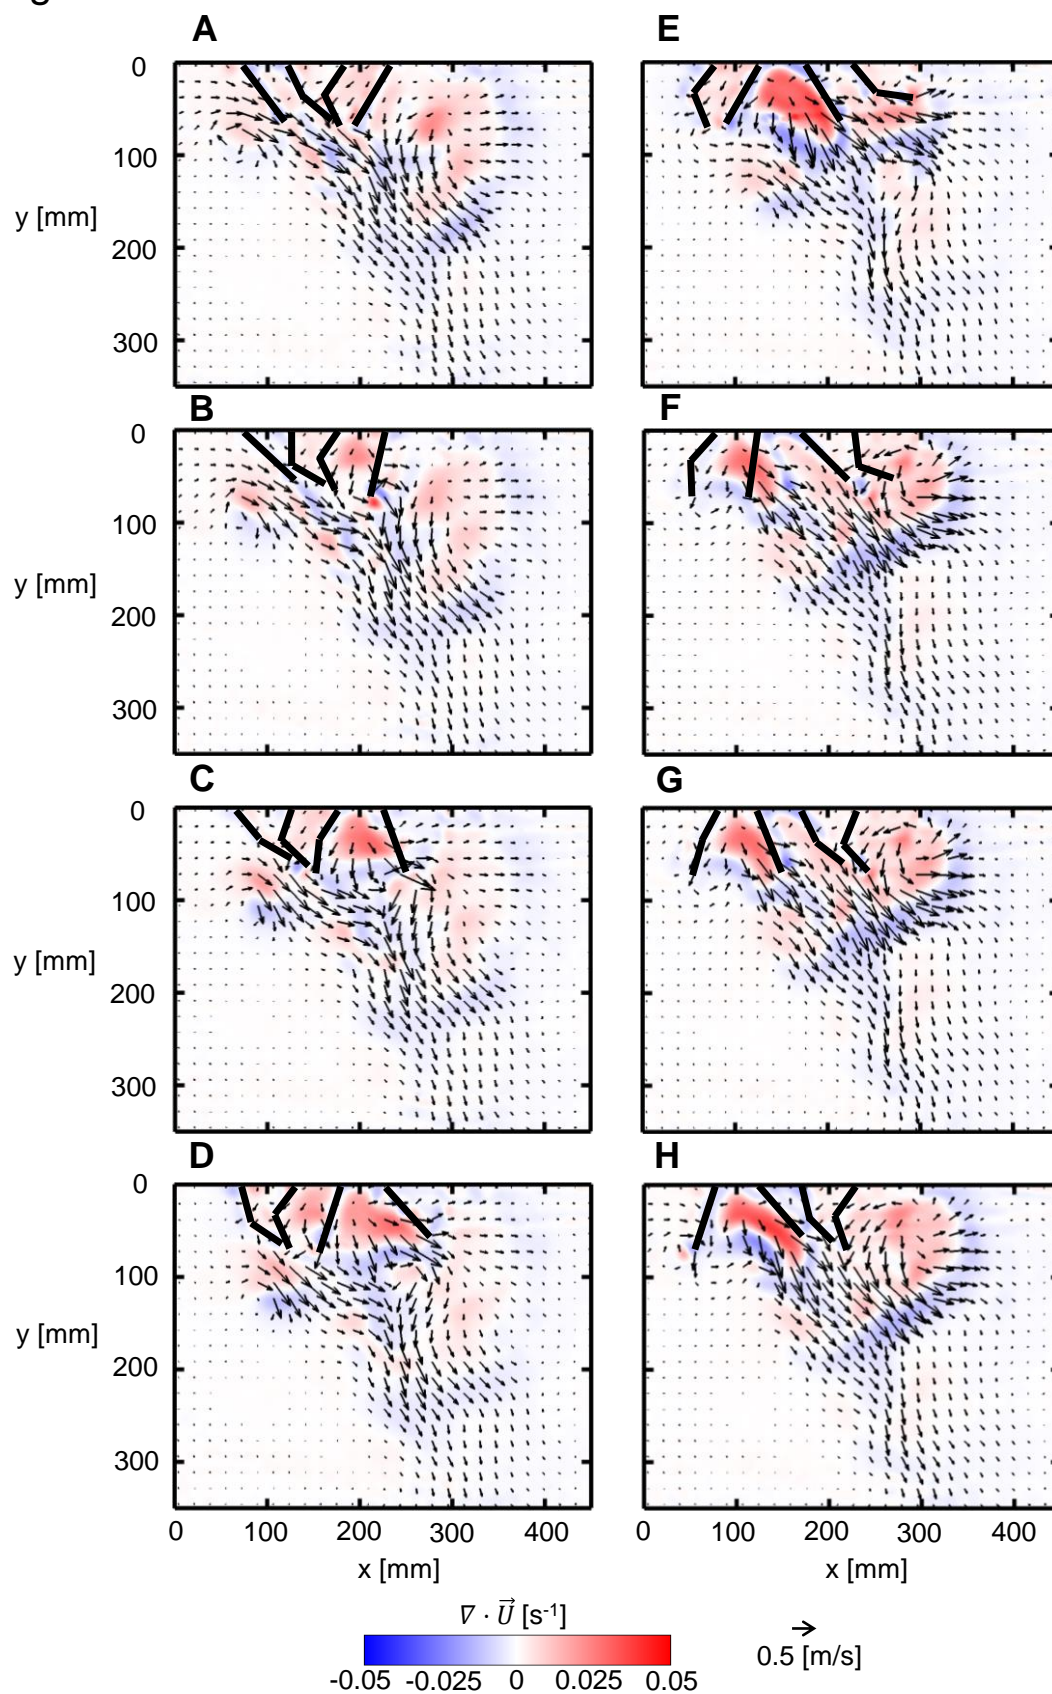

Figure S9

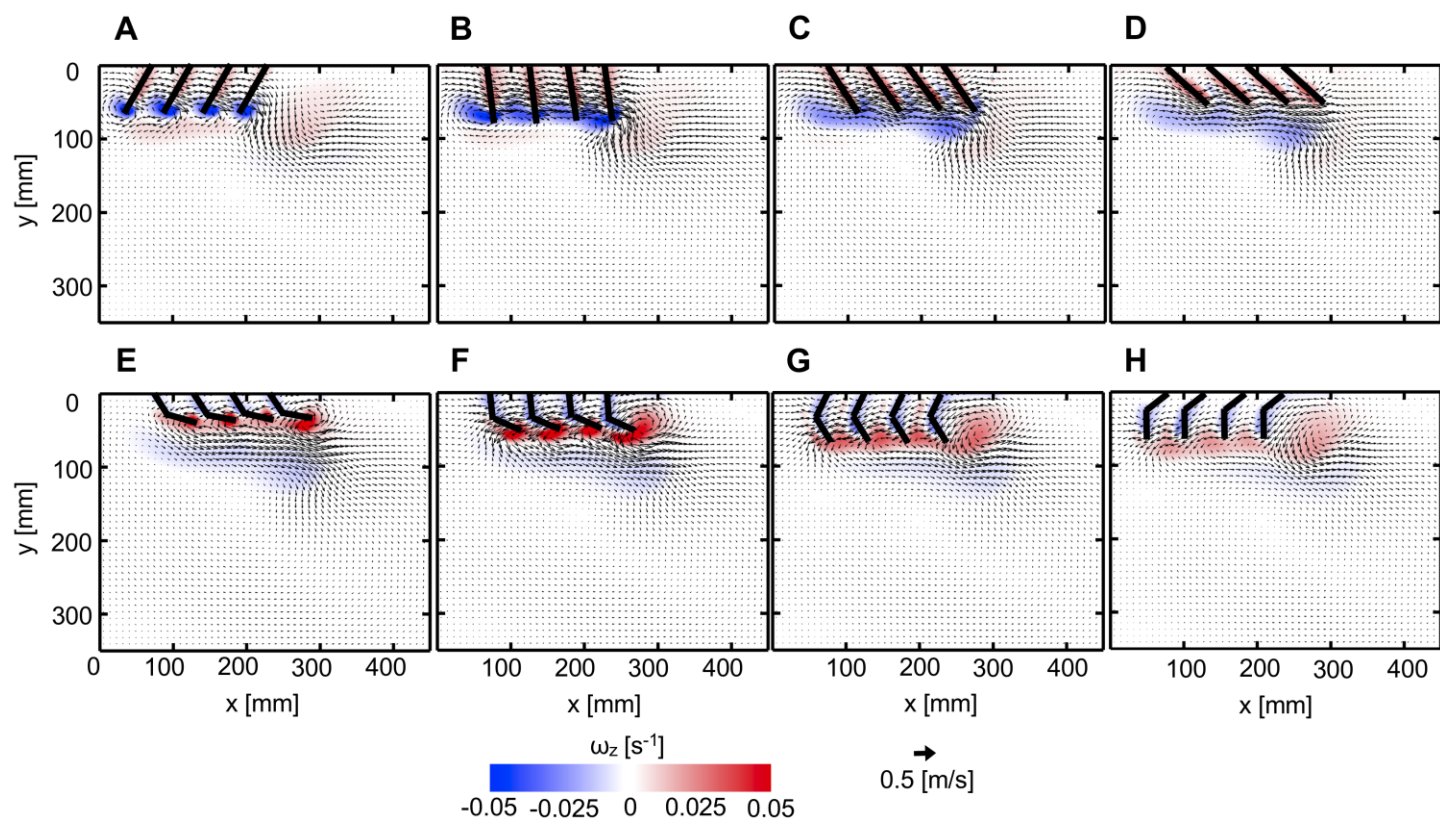



Figure S10

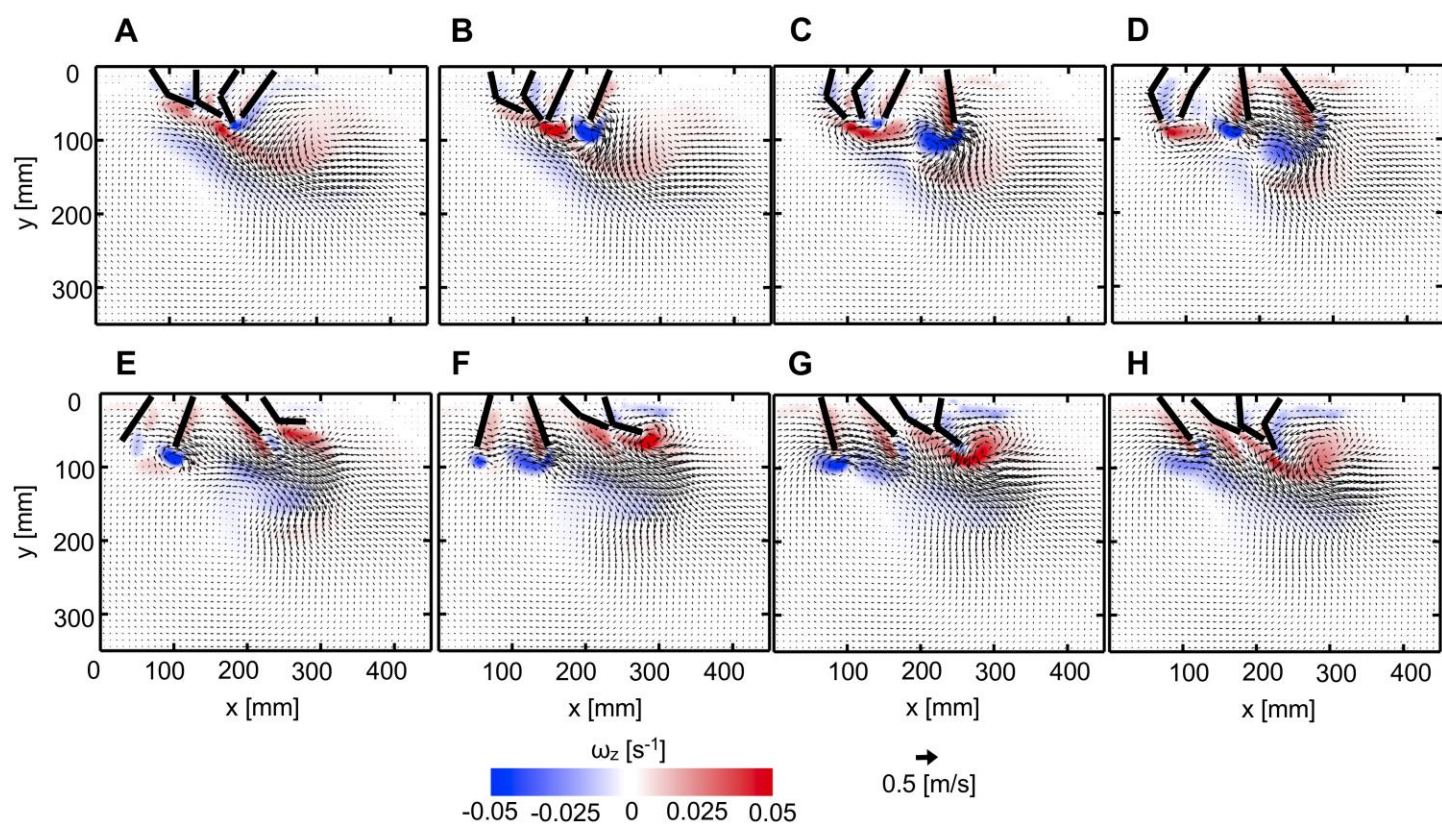



Figure S11

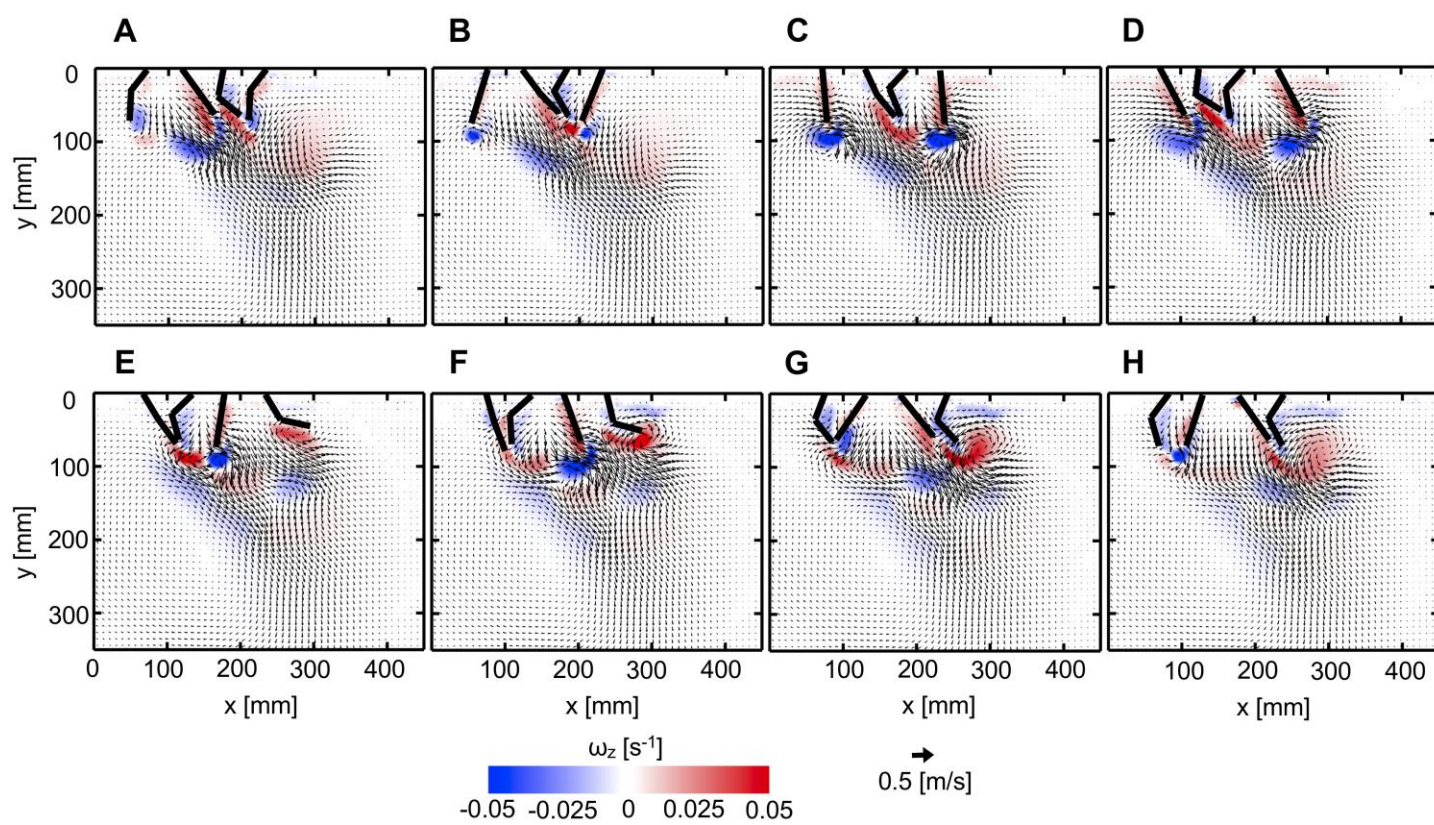

Figure S12

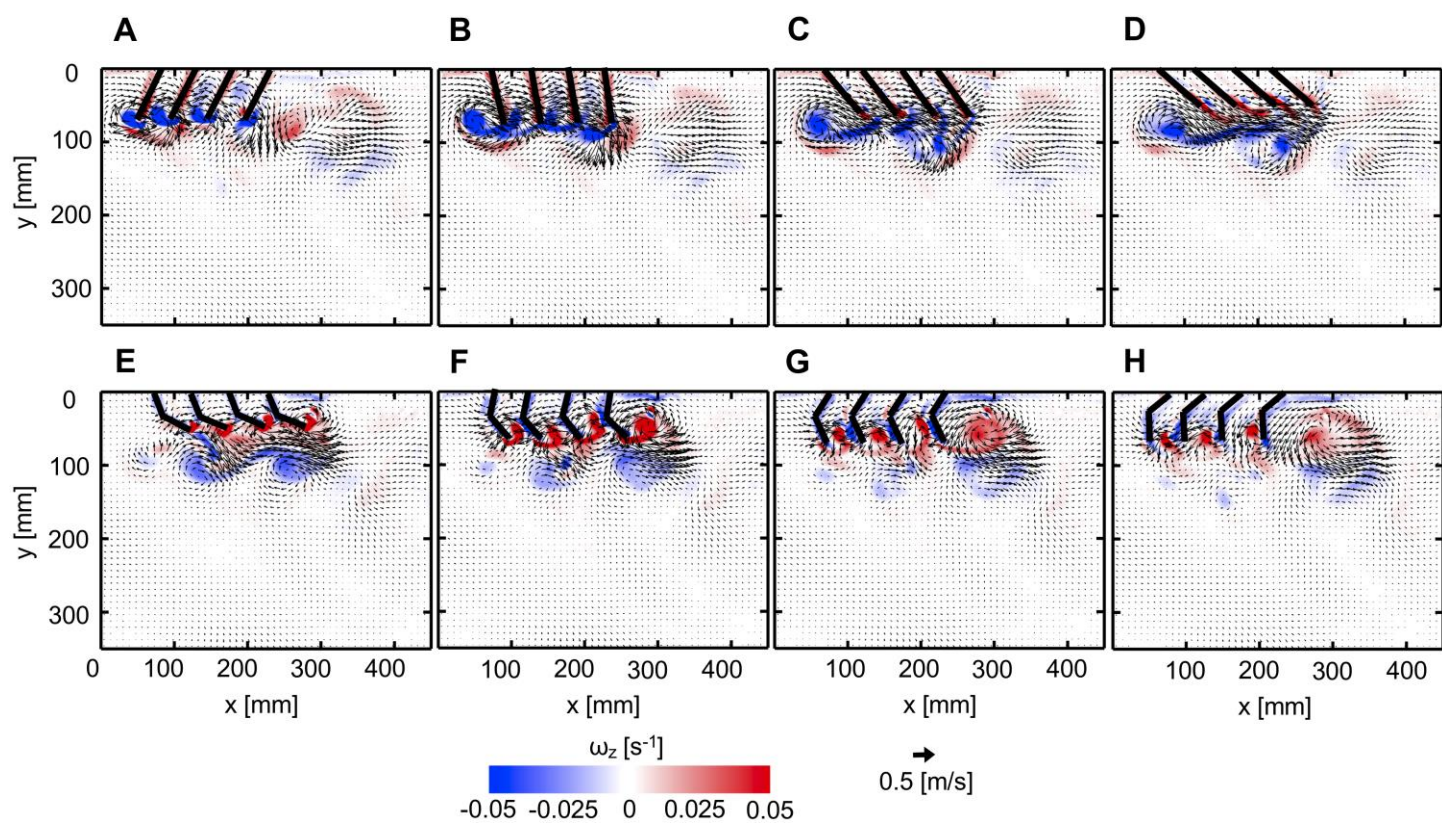



Figure S13

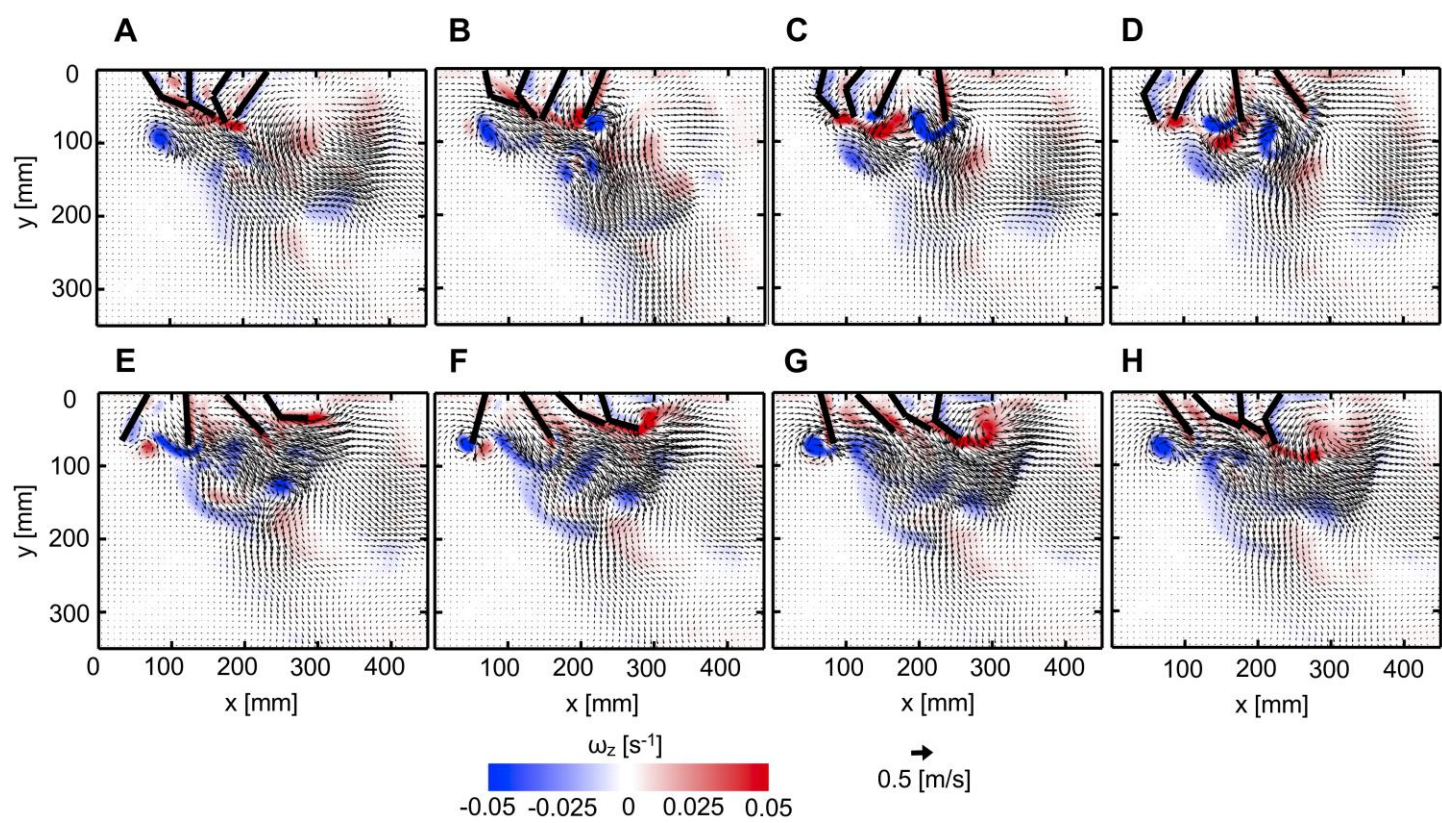

Figure S14

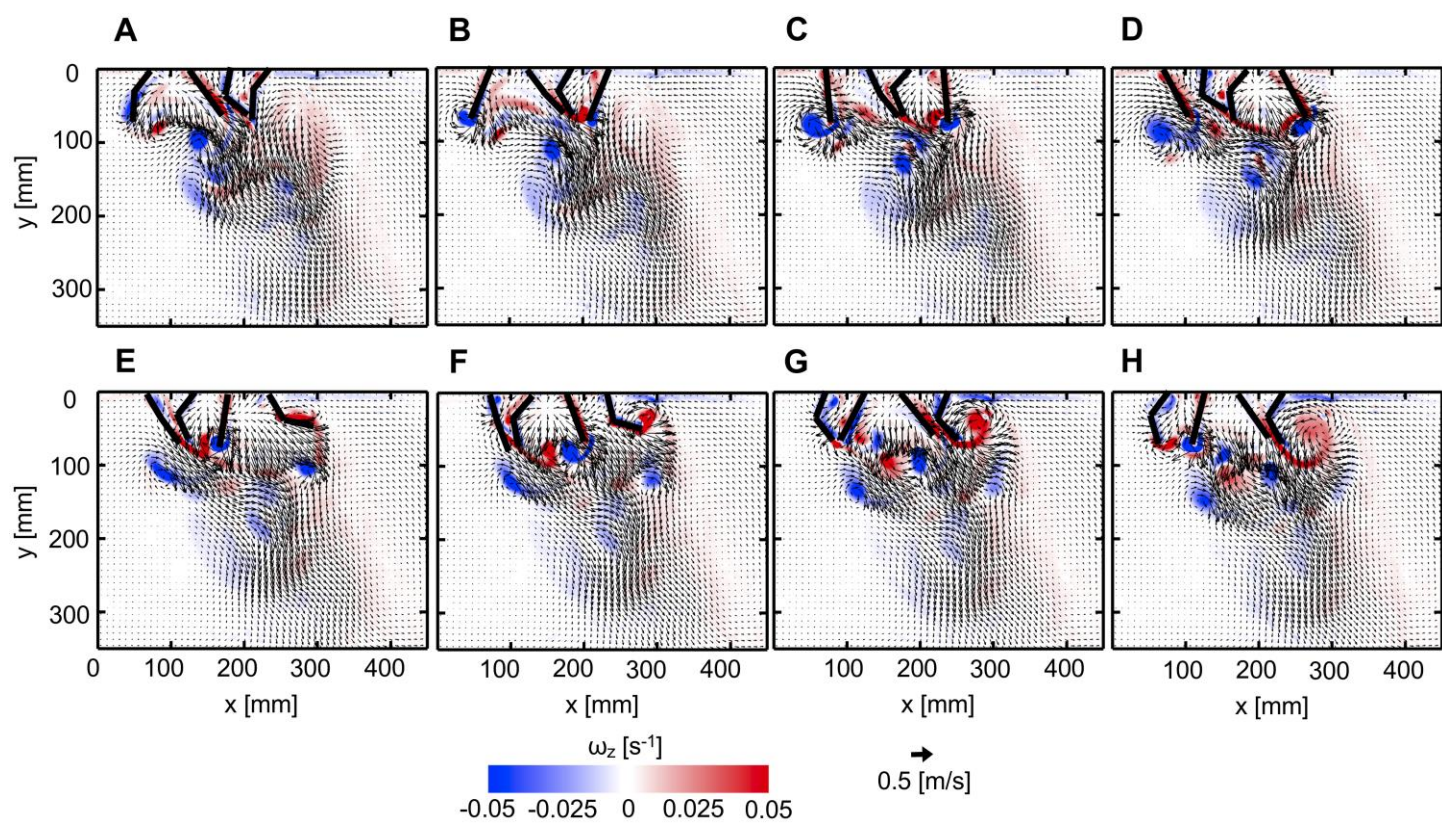

Supplement: Supplementary file 1 [file 17853680]
